# Supplementary material for: Organic Compounds as Corrosion Inhibitors for Carbon Steel in HCl Solution: A Comprehensive Review
Source: MDPI journal article supplement (doi:10.3390/ma15062023), 2022-03-09
Supplement: s1 [file s1]

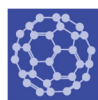**Table S1** Physicochemical and morphology characterization techniques for corrosion inhibitor investigations.

|    | Techniques                                           | Abbreviations       |
|----|------------------------------------------------------|---------------------|
| 1  | Fourier transform infrared spectroscopy              | FTIR                |
| 2  | UV–visible spectroscopy                              | UV                  |
| 3  | Raman spectroscopy                                   | Ram                 |
| 4  | X-ray diffraction spectroscopy                       | XRD                 |
| 5  | X-ray photoelectron spectroscopy                     | XPS                 |
| 6  | Scanning electron microscope                         | SEM                 |
| 7  | Atomic force microscopy                              | AFM                 |
| 8  | Transmission electron microscopy                     | TEM                 |
| 9  | Energy dispersive spectrometer                       | EDS                 |
| 10 | Digital light scattering                             | DLS                 |
| 11 | Laser scanning confocal microscopy                   | LSCM                |
| 12 | Scanning probe microscopy                            | SPM                 |
| 13 | Optical microscopy                                   | OM                  |
| 14 | Scanning kelvin probe                                | SKP                 |
| 15 | Thermogravimetric Analysis                           | TGA                 |
| 16 | Contact angle                                        | CA                  |
| 17 | Ion chromatography                                   | IC                  |
| 18 | Proton nuclear magnetic resonance spectroscopy       | <sup>1</sup> H NMR  |
| 19 | Carbon nuclear magnetic resonance spectroscopy       | <sup>13</sup> C NMR |
| 20 | Fluorine nuclear magnetic resonance spectroscopy     | <sup>19</sup> F NMR |
| 21 | Distortionless enhancement by polarization transfer  | DEPT NMR            |
| 22 | Mass spectrum                                        | MS                  |
| 23 | High resolution mass spectrum                        | HRMS                |
| 24 | Gas chromatography coupled with mass spectrometry    | GC–MS               |
| 25 | Liquid chromatography coupled with mass spectrometry | LC–MS               |
| 26 | Centrifugal partition chromatography                 | CPC                 |
| 27 | High-performance liquid chromatography               | HPLC                |
| 28 | Thin-layer chromatography                            | TLC                 |
| 29 | Rheological mechanical spectrometer                  | RMS                 |
| 30 | Gel permeation chromatography                        | GPC                 |
| 31 | Zeta potential analysis                              | -                   |
| 32 | Capillary viscometry                                 | -                   |
| 33 | Surface tension                                      | -                   |
| 34 | Emulsification power                                 | -                   |
| 35 | Foam power                                           | -                   |
| 36 | Conductivity method                                  | -                   |
| 37 | Ubbelohde capillary viscometer                       | -                   |
| 38 | Biodegradability test                                | -                   |
| 39 | Biocorrosion monitoring                              | -                   |
| 40 | Antimicrobial assay                                  | -                   |

**Table S2.** Drugs as corrosion inhibitors for carbon steel in 1.0 M HCl media, the techniques, methods and instruments used for evaluation of the inhibition performance, and the results obtained.

| Inhibitor name | Sample | Optimum concentration | Techniques/<br>Investigations | Max Efficiency (%) | T (°C) | Electrochemical Type | Sorption | Isotherm model | Ref |
|----------------|--------|-----------------------|-------------------------------|--------------------|--------|----------------------|----------|----------------|-----|
|----------------|--------|-----------------------|-------------------------------|--------------------|--------|----------------------|----------|----------------|-----|

|    |                                                                                                                                   |              |                          |                                                       |           |    |                         |                   |                     |                     |
|----|-----------------------------------------------------------------------------------------------------------------------------------|--------------|--------------------------|-------------------------------------------------------|-----------|----|-------------------------|-------------------|---------------------|---------------------|
| 1  | (Z)-4-(4-hydroxy-3-methoxybenzylidene)-3-methylisoxazol-5(4H)-one                                                                 | Mild steel   | 300 ppm                  | <sup>1</sup> H NMR; WL; EIS; PDP; FTIR; AFM; SEM; EDS | 96.6      | 30 | Mixed type of inhibitor | Chemical          | Langmuir            | <a href="#">258</a> |
| 2  | L-cysteine                                                                                                                        | Mild steel   | 5 mM                     | EIS; PDP; SEM; DFT; MD                                | 91        | -  | Mixed type of inhibitor | Physical–chemical | Langmuir            | <a href="#">142</a> |
| 3  | Penicillin G                                                                                                                      | Carbon steel | 10 mM                    | EDX; EN; EIS; PDP; SEM; FTIR                          | 98.4      | 25 | Mixed type of inhibitor | Physical          | Langmuir            | <a href="#">139</a> |
| 4  | Fluconazole                                                                                                                       | X52 steel    | 20 ppm/200 ppm           | EIS; PDP; AFM; SEM; XPS; DFT; MEP                     | 89.9/90.6 | 20 | Mixed type of inhibitor | Physical–chemical | Langmuir            | <a href="#">146</a> |
| 5  | Analgin                                                                                                                           | Mild steel   | 4000 ppm                 | PDP; EIS; WL; MD; SEM; AFM                            | 96.1      | 25 | Mixed type of inhibitor | Physical          | Langmuir            | <a href="#">165</a> |
| 6  | Pheniramine                                                                                                                       | Mild steel   | 0.833 mM                 | WL; PDP; EIS; SEM; DFT                                | 98.1      | 35 | Mixed type of inhibitor | Physical–chemical | Langmuir            | <a href="#">149</a> |
| 7  | Phenylephrine                                                                                                                     | Mild steel   | 4000 ppm                 | PDP; EIS; WL; DFT; MC; AFM                            | 88        | 25 | Mixed type of inhibitor | -                 | Langmuir            | <a href="#">259</a> |
| 8  | Phenobarbital [5-ethyl-5-phenylpyrimidine-2,4,6(1H,3H,5H)-trione]                                                                 | Mild steel   | 200 ppm                  | WL; DFT                                               | 95        | 35 | -                       | Chemical          | Langmuir            | <a href="#">260</a> |
| 9  | 4-chloro-1H-pyrazolo[3,4-d]pyrimidine                                                                                             | Mild steel   | 1 × 10 <sup>-3</sup> M   | PDP; EIS; OM; DFT                                     | 92.7      | 30 | Mixed type of inhibitor | Chemical          | Langmuir            | <a href="#">261</a> |
| 10 | Acrylamide methyl ether                                                                                                           | Mild steel   | 500 mg/L                 | WL; PDP; EIS; DFT                                     | 98        | 25 | Mixed type of inhibitor | Chemical          | Langmuir            | <a href="#">262</a> |
| 11 | Expired Ambroxol drug                                                                                                             | Mild steel   | 9 v/v%                   | WL; PDP; EIS; SEM; EDX; FTIR; DFT                     | 94.03     | -  | Mixed type of inhibitor | Chemical          | Temkin and Langmuir | <a href="#">254</a> |
| 12 | Amlodipine Besylate                                                                                                               | Carbon steel | 250 ppm                  | WL; PDP; EIS; EFM; SEM; EDX; QM                       | 84        | 30 | Mixed type of inhibitor | Physical          | Langmuir            | <a href="#">263</a> |
| 13 | (3R,5R)-7-(2-(4-fluorophenyl)-5-isopropyl-3-phenyl-4-(phenylcarbamoyl)-1H-pyrrol-1-yl)-3,5-dihydroxyheptanoic acid (Atorvastatin) | Mild steel   | 150 ppm                  | PDP; EIS; WL; SEM                                     | 99.08     | -  | Mixed type of inhibitor | Physical–chemical | Langmuir            | <a href="#">264</a> |
| 14 | ((±)-[3-(9H-carbazol-4-yloxy)-2-hydroxypropyl][2-(2-methoxyphenoxy)ethyl]amine) (Carvedilol drug)                                 | Carbon steel | 1.6 × 10 <sup>-4</sup> M | WL; PDP; EIS; EFM; AFM                                | 98.9      | 25 | Mixed type of inhibitor | Physical–chemical | Langmuir            | <a href="#">265</a> |
| 15 | Expired asthalin drug                                                                                                             | Mild steel   | 9 v/v%                   | WL; PDP; EIS; SEM                                     | 94.76     | -  | Mixed type of inhibitor | -                 | Langmuir            | <a href="#">266</a> |
| 16 | Semisynthetic antibiotic cloxacillin                                                                                              | Mild steel   | 15 × 10 <sup>-4</sup> M  | WL; PDP; EIS; HE; UV                                  | 81.19     | -  | Mixed type of inhibitor | -                 | Temkin              | <a href="#">267</a> |
| 17 | Streptomycin                                                                                                                      | Mild steel   | 500 ppm                  | WL; PDP; EIS; AFM                                     | 88.5      | 35 | Mixed type of inhibitor | -                 | Langmuir            | <a href="#">152</a> |
| 18 | Atenolol ((RS)-2-{4-[2-Hydroxy-3-(propan-2-ylamino)propoxy]phenyl}acetamide)                                                      | Mild steel   | 300 ppm                  | EIS; PDP; WL; QM; SEM; FTIR                           | 93.8      | -  | Mixed type of inhibitor | Physical          | Langmuir            | <a href="#">156</a> |

|    |                                                                                                              |              |                          |                                                              |       |    |                                                     |                   |                     |     |
|----|--------------------------------------------------------------------------------------------------------------|--------------|--------------------------|--------------------------------------------------------------|-------|----|-----------------------------------------------------|-------------------|---------------------|-----|
| 19 | Expired Tramadol                                                                                             | Mild steel   | 100 mg·L <sup>-1</sup>   | W; PDP; EIS;<br>AFM; SEM; DFT;<br>MEP                        | 97.2  | 35 | Mixed type of inhibitor                             | Physical–chemical | Langmuir            | 158 |
| 20 | Sulfa drugs (sulfadiazine)                                                                                   | Mild steel   | 5 mM                     | WL; PDP                                                      | 94    | 25 | Mixed type of inhibitor with a predominant cathodic | -                 | -                   | 160 |
| 21 | Cefalexin                                                                                                    | Mild steel   | 400 ppm                  | WL; PDP; EIS;<br>AFM                                         | 92.1  | 35 | Mixed type of inhibitor                             | Physical          | Langmuir            | 164 |
| 22 | Losartan potassium                                                                                           | Q235 steel   | 5 mM                     | OCP; PDP; EIS;<br>SVET; W; SEM;<br>AFM; XPS; DFT;<br>MD; RDF | 94    | 45 | Mixed type of inhibitor                             | Physical–chemical | Langmuir            | 78  |
| 23 | Piroxicam                                                                                                    | Mild steel   | 600 ppm                  | WL; DFT; SEM                                                 | 86.9  | 25 | Mixed type of inhibitor                             | Physical–chemical | Langmuir            | 166 |
| 24 | Ceftriaxone                                                                                                  | Mild steel   | 400 ppm                  | WL; PDP; EIS                                                 | 92.59 | -  | Mixed type of inhibitor                             | Physical          | Langmuir            | 171 |
| 25 | Irbesartan drug                                                                                              | Mild steel   | 300 mg·L <sup>-1</sup>   | OCP; PDP; EIS;<br>CV; UV; FTIR; <sup>1</sup> H<br>NMR; SEM   | 95    | -  | Mixed type of inhibitor                             | Physical–chemical | Langmuir            | 70  |
| 26 | Venlafaxine                                                                                                  | Mild steel   | 4000 ppm                 | WL; EIS; PDP;<br>MD; DFT; AFM                                | 86.8  | 25 | Mixed type of inhibitor                             | Physical          | Langmuir            | 168 |
| 27 | Fexofenadine (4-{1-hydroxy-4-(4-(hydroxy-diphenyl-methyl)-1-piperidyl)butyl}phenyl]-2-methyl-propanoic acid) | Mild steel   | 3.0 × 10 <sup>-4</sup> M | EIS; PDP; WL;<br>FTIR; DFT                                   | 98    | -  | Mixed type of inhibitor                             | Chemical          | Langmuir            | 151 |
| 28 | Pioglitazone drug                                                                                            | Mild steel   | 14 × 10 <sup>-4</sup> M  | WL; PDP; EIS;<br>SEM                                         | 79.51 | 30 | Mixed type of inhibitor                             | -                 | -                   | 169 |
| 29 | Clozapine                                                                                                    | Mild steel   | 1 × 10 <sup>-3</sup> M   | PDP; EIS; WL;<br>DFT; MD; RDF;<br>SEM                        | 97.46 | 30 | Mixed type of inhibitor                             | Physical–chemical | Langmuir            | 268 |
| 30 | Non-toxic bisacodyl (Bis (p-acetoxypheyl)-2-pyridylmethane (Bisacodyl))                                      | Mild steel   | 300 ppm                  | WL; OCP; PDP;<br>EIS; SEM; EDX;<br>AFM; FTIR; DFT;<br>MD     | 92.62 | 30 | Mixed type of inhibitor                             | Physical          | Langmuir and Temkin | 81  |
| 31 | Moxifloxacin antibiotic                                                                                      | Carbon steel | 300 ppm                  | WL; HE; PDP;<br>EIS; EFM; SEM;<br>EDX;                       | 94.1  | 25 | Mixed type of inhibitor                             | Physical          | Langmuir            | 67  |
| 32 | Dapsone's Schiff's base with salicylaldehyde (1:2)                                                           | Mild steel   | 500 ppm                  | WL; EIS; PDP;<br>QM                                          | 97    | -  | Mixed type of inhibitor                             | Physical          | Langmuir            | 269 |
| 33 | Benzohydrazide Schiff bases ((Z)-2-hydroxy-N'-(2-oxo-1,2-diphenylethylidene) benzohydrazide)                 | Carbon steel | 300 ppm                  | WL; PDP; EIS;<br>SEM; EDX; DFT;<br>MD                        | 96.5  | 25 | Mixed type of inhibitor                             | Physical–chemical | Langmuir            | 270 |
| 34 | Quercetin                                                                                                    | Mild steel   | 800 ppm                  | FTIR; UV; SEM;<br>AFM; OCP; PDP;<br>EIS; WL; MC;<br>MD; DFT  | 95    | 25 | Mixed type of inhibitor                             | Physical–chemical | Langmuir            | 271 |
| 35 | Schiff base ((E,E)-N,N'-dibenzo[b,d]thiene-2,8-                                                              | Mild steel   | 1 × 10 <sup>-3</sup> M   | FTIR; <sup>1</sup> H NMR;<br><sup>13</sup> C NMR; WL;        | 92.95 | 25 | Mixed type of inhibitor                             | Physical–chemical | Langmuir            | 272 |

|    |                                                                                                                                                   |              |                        |                                                                     |       |    |                            |                   |          |     |
|----|---------------------------------------------------------------------------------------------------------------------------------------------------|--------------|------------------------|---------------------------------------------------------------------|-------|----|----------------------------|-------------------|----------|-----|
|    | diylbis[1-(thiophen-2-yl)methanimine])                                                                                                            |              |                        | PDP; EIS; SEM; DFT                                                  |       |    |                            |                   |          |     |
| 36 | Carboxamide ligands ((N-(quinolin-8-yl) quinoline-2-carboxamide))                                                                                 | Mild steel   | 100 ppm                | OCP; EIS; FTIR; SEM                                                 | 94.34 | 25 | -                          | Physical–chemical | Langmuir | 273 |
| 37 | Omeprazole                                                                                                                                        | C38 Steel    | $5 \times 10^{-3}$ M   | WL; PDP; EIS; DFT; MD; RDF; SEM                                     | 98.36 | 25 | Mixed type of inhibitor    | Chemical          | Langmuir | 170 |
| 38 | Expired anti-tuberculosis drug (Schiff bases of Isoniazid with 5-substitute indole derivatives)                                                   | Mild steel   | 200 mg·L <sup>-1</sup> | FTIR; <sup>1</sup> H NMR; WL; EIS; PDP; SEM; EDX; AFM; XPS; DFT; MD | 99.3  | -  | Mixed type of inhibitor    | Physical–chemical | -        | 274 |
| 39 | Niclosamide drug (5-chloro-N-(2-chloro-4-nitrophenyl)-2-hydroxyenzamide)                                                                          | C-steel      | 50 µM                  | WL;PDP; EIS; EFM; SEM; EDX; AFM; FTIR; QM; MC                       | 99.0  | 30 | Mixed type of inhibitor    | Physical–chemical | Langmuir | 275 |
| 40 | Antibiotic drug - ampicillin ((2S,6R)-6-(2-(aminomethyl)benzamido)-3,3-dimethyl-7-oxo-4-thia-1-azabicyclo(3.2.0) heptanes-2-carboxylic acid)      | Mild steel   | $5 \times 10^{-3}$ M   | WL; QM                                                              | 75.85 | 30 | -                          | Physical          | Langmuir | 276 |
| 41 | Expired pharmaceutical gentamicin drug                                                                                                            | Mild steel   | 0.9 v/v%               | WL; PDP; EIS; SEM                                                   | 92.36 | 30 | Mixed type of inhibitor    | Chemical          | Langmuir | 277 |
| 42 | Non-steroidal anti-Inflammatory drug - Piroxicam                                                                                                  | Mild steel   | 600 ppm                | EIS; PDP; QM; SEM                                                   | 91.98 | 25 | Mixed type of inhibitor    | Physical–chemical | Langmuir | 278 |
| 43 | Modazar drug: Hydrochlorothiazide (25 mg)/Losartan (100 mg)                                                                                       | Carbon steel | 300 ppm                | OCP; WL; HE; PDP; EIS; EFM; EDX; SEM; AFM                           | 92.3  | 25 | Mixed type of inhibitor    | Physical          | Langmuir | 279 |
| 44 | Torseamide drug                                                                                                                                   | Mild steel   | $14 \times 10^{-4}$ M  | WL; PDP; EIS; EDX; SEM; AFM                                         | 91.68 | -  | Mixed type of inhibitor    | Physical–chemical | Langmuir | 280 |
| 45 | Expired indocin-SR drug                                                                                                                           | Carbon steel | 500 ppm                | WL; OCP; PDP; EIS; SEM                                              | 83.81 | 25 | Mixed type of inhibitor    | Physical–chemical | Langmuir | 281 |
| 46 | Ketoconazole drug (1-[4-({[(2R,4S)-2-(2,4-Dichlorophenyl)-2-(1H-imidazol-1-ylmethyl)-1,3-dioxolan-4-yl]methoxy}phenyl)piperazin-1-yl]ethan-1-one) | Mild steel   | 100 ppm                | WL; EIS; PDP; SKP; SEM; AFM; QM                                     | 94    | -  | Mixed type of inhibitor    | -                 | Langmuir | 282 |
| 47 | Megavit zinc drugs                                                                                                                                | C-steel      | 300 ppm                | COP; PDP; EIS                                                       | 91.7  | 30 | Mixed type mainly cathodic | -                 | Langmuir | 283 |

**Table S3.** Ionic liquids as corrosion inhibitors for carbon steel in 1.0 M HCl media, the techniques, methods and instruments used for evaluation of the inhibition performance, and the results obtained.

|   | Inhibitor name                                                           | Sample     | Optimum concentration | Techniques/Investigations | Max Efficiency (%) | T (°C) | Electrochemical Type   | Sorption | Isotherm model | Ref |
|---|--------------------------------------------------------------------------|------------|-----------------------|---------------------------|--------------------|--------|------------------------|----------|----------------|-----|
| 1 | 1-butyl-4-(2-(4-fluorobenzylidene)hydrazinecarbonyl)pyridin-1-ium iodide | Mild steel | 10 <sup>-3</sup> M    | PDP; EIS; DFT; MD; RDF    | 92.30              | 25     | Anodic type inhibitors | Chemical | Langmuir       | 284 |

|    |                                                                                                       |              |                                      |                                                                              |       |    |                                           |                   |           |                     |
|----|-------------------------------------------------------------------------------------------------------|--------------|--------------------------------------|------------------------------------------------------------------------------|-------|----|-------------------------------------------|-------------------|-----------|---------------------|
| 2  | 3-(4-chlorobenzoylmethyl)-1-methylbenzimidazoliumbromide                                              | Carbon steel | $6.84 \times 10^{-4}$ M              | FTIR; $^1\text{H}$ NMR; $^{13}\text{C}$ NMR; EIS; PDP; EN; HE; SEM; EDX; DFT | 97.9  | –  | Mixed type of inhibitor                   | Physical–chemical | Langmuir  | <a href="#">285</a> |
| 3  | 1-butyl-1H-imidazol-1-ium 3-carboxy-2-((2-carboxylatoethyl)thio)propanoate                            | A3 steel     | 10 mM                                | TGA; WL; FTIR; XPS; SEM; DFT; CA; QM                                         | 90.11 | 25 | –                                         | Physical–chemical | Langmuir  | <a href="#">286</a> |
| 4  | Benzyltributylammonium tetrachloroferrate                                                             | Carbon steel | 400 ppm                              | EIS; PDP; SEM; FTIR; UV; SEM; HE; DFT; MC                                    | 99.50 | –  | Mixed type of inhibitor                   | –                 | Langmuir  | <a href="#">183</a> |
| 5  | 3-Dodecyl-1,2-dimethyl-1H-imidazol-3-ium tetrafluoroborate                                            | Carbon steel | 200 ppm                              | PDP; EIS; FTIR; XRD; $^1\text{H}$ NMR; TGA                                   | 92.8  | 25 | Anodic type inhibitors                    | Physical          | Temkin    | <a href="#">287</a> |
| 6  | 5-(Trifluoromethyl)dibenzothioipheniumtrifluoromethanesulfonate                                       | Mild steel   | $8.0 \times 10^{-2}$ M               | PDP; EIS; FTIR; SEM; EDS; WL; DFT; QM; MC                                    | 90.2  | 30 | Mixed type of inhibitor (mainly anodic)   | Physical          | Langmuir  | <a href="#">288</a> |
| 7  | 2-hydroxyethyl-trimethylammonium acetate                                                              | Mild steel   | $17.91 \times 10^{-4}$ M             | WL; PDP; EIS; SEM; AFM; EDX; DFT; MC                                         | 96.59 | –  | Mixed type of inhibitor                   | Physical–chemical | Temkin    | <a href="#">41</a>  |
| 8  | Tetra-n-butyl ammonium methioninate                                                                   | Mild steel   | $1.59 \times 10^{-3}$ M              | PDP; EIS; EN; DFT; QM; SEM; EDX                                              | 95.1  | –  | Mixed type of inhibitor                   | Physical          | Frundlich | <a href="#">64</a>  |
| 9  | (E)-4-(2-(4-fluorobenzylidene)hydrazinecarbonyl)-1-propylpyridin-1-ium iodide                         | Mild steel   | $10^{-3}$ M                          | EIS; PDP; DFT; MD; RDF; SEM                                                  | 90.1  | 25 | Anodic type inhibitors                    | Physical–chemical | Langmuir  | <a href="#">289</a> |
| 10 | 1-ethyl-3-methylimidazolium ethylsulfate                                                              | Mild steel   | 500 ppm                              | PDP; EIS; UV; FTIR; SEM; QM; QSAR; MC                                        | 92.76 | –  | Mixed type of inhibitor (mainly cathodic) | Physical–chemical | Langmuir  | <a href="#">290</a> |
| 11 | 1-(6-ethoxy-6-oxohexyl)pyridazin-1-ium bromide                                                        | Mild steel   | $10^{-3}$ M                          | EIS; MD                                                                      | 84    | 30 | –                                         | Chemical          | Langmuir  | <a href="#">291</a> |
| 12 | 3-(4-chlorophenylacetyl)-1-ethylbenzimidazolium tetrafluoroborate                                     | Carbon steel | 250 ppm                              | $^1\text{H}$ NMR; FTIR; EN; HE; SEM                                          | 97.4  | 30 | –                                         | Physical–chemical | Langmuir  | <a href="#">292</a> |
| 13 | 1-butyl-3-methylimidazolium bromide                                                                   | Mild steel   | 20 mM                                | WL; PDP; EIS                                                                 | 94    | 25 | Mixed type of inhibitor                   | Physical          | Langmuir  | <a href="#">293</a> |
| 14 | 3-hexadecyl-1,2-dimethyl-1H-imidazol-3-ium bromide                                                    | Mild steel   | 250 ppm                              | $^1\text{H}$ NMR; FTIR; WL; PDP; EIS; UV; SEM; EDX; AFM                      | 87.12 | 25 | Mixed type of inhibitor                   | Physical–chemical | Langmuir  | <a href="#">294</a> |
| 15 | 1-methyl-3-(2-{2-[1-methyl-1-H-imidazol-3-ium-3-yl)ethoxy]ethoxy}-ethyl)-1H-imidazol-3-ium dichloride | Mild steel   | $200 \text{ mg} \cdot \text{L}^{-1}$ | WL; PDP; EIS; Surface tension measurements; AFM; SEM; CA                     | 77    | –  | Mixed type of inhibitor (mainly anodic)   | Physical–chemical | Langmuir  | <a href="#">295</a> |
| 16 | 1-butyl-3-methylimidazolium hydrogen sulfate                                                          | Mild steel   | $1 \times 10^{-2}$ M                 | $^1\text{H}$ NMR; WL; EIS; PDP                                               | 93.6  | 30 | Mixed type of inhibitor                   | Physical          | Langmuir  | <a href="#">296</a> |

|    |                                                                                              |                   |                         |                                                                                                                                    |       |    |                                           |                   |                                            |     |
|----|----------------------------------------------------------------------------------------------|-------------------|-------------------------|------------------------------------------------------------------------------------------------------------------------------------|-------|----|-------------------------------------------|-------------------|--------------------------------------------|-----|
| 17 | 1-Hexyl-3-methylimidazolium iodide                                                           | Mild steel        | $5 \times 10^{-3}$ M    | EIS; PDP; EFM; SEM; AFM; FTIR; QM                                                                                                  | 93.6  | 25 | Mixed type of inhibitor                   | Physical          | Langmuir                                   | 297 |
| 18 | 1-ethyl-3-phenethylimidazol-3-ium bromide                                                    | Carbon steel      | $5 \times 10^{-3}$ M    | $^1\text{H}$ NMR; $^{13}\text{C}$ NMR; LC–MS; WL; PDP; SEM                                                                         | 80.9  | 25 | Mixed type of inhibitor                   | Physical          | Langmuir                                   | 298 |
| 19 | 1-hydroxyethyl-3-2011methylimidazolium hexafluorophosphate                                   | Mild steel        | 16 mM                   | Conductivity method; EIS; PDP; SEM; UV; MD                                                                                         | 79.94 | 25 | Mixed type of inhibitor (mainly cathodic) | Physical          | Langmuir                                   | 299 |
| 20 | 1-decyl-3-methylimidazolium tetrafluoroborate                                                | Mild steel        | 500 ppm                 | PDP; EIS; UV; FTIR; Ram; SEM; QM; MC                                                                                               | 98.08 | 30 | Mixed type of inhibitor                   | Physical          | Langmuir                                   | 177 |
| 21 | 1-butyl-3-methylimidazolium acetate                                                          | Mild steel        | $8.67 \times 10^{-4}$ M | FTIR; $^1\text{H}$ NMR; $^{13}\text{C}$ NMR; WL; OCP; PDP; EIS; AFM; SEM; DFT; MD                                                  | 97.15 | -  | Mixed type of inhibitor (mainly anodic)   | -                 | Temkin                                     | 300 |
| 22 | 1-vinyl-3-aminopropylimidazolium hexafluorophosphate                                         | Q235 Carbon steel | 0.8 mM                  | $^1\text{H}$ NMR; $^{13}\text{C}$ NMR; FTIR; Surface tension measurements; Conductivity method; WL; EIS; PDP; SEM; EDX; CA; UV; MD | 90.53 | 45 | Mixed type of inhibitor (mainly cathodic) | Physical–chemical | Langmuir and EI-Awady kinetic-therodynamic | 174 |
| 23 | 1-Methyl-1-octyl-pyrrolidinium dicyanamide                                                   | Mild steel        | $5 \times 10^{-3}$ M    | PDP; EIS; SEM; FTIR; QM                                                                                                            | 96.21 | 25 | Mixed (mainly cathodic)                   | Physical–chemical | Langmuir                                   | 178 |
| 24 | 3-((4-amino-2-methylpyrimidin-5-yl)methyl)-5-(2-hydroxyethyl)-4-methylthiazol-3-ium chloride | Carbon steel      | 40 ppm                  | WL; XRD; QM; SEM; EDS; OCP                                                                                                         | 91.40 | -  | Mixed type of inhibitor                   | Chemical          | Langmuir                                   | 185 |
| 25 | 1-hexylpyridinium bromide                                                                    | Carbon steel      | $3 \times 10^{-3}$ M    | WL; LPR; EIS; SEM                                                                                                                  | 88.6  | 21 | Mixed type of inhibitor                   | Physical          | Langmuir                                   | 180 |
| 26 | 1-(3-bromopropyl)-4-(dimethylamino)pyridinium bromide                                        | Carbon steel      | $3 \times 10^{-3}$ M    | $^1\text{H}$ NMR; $^{13}\text{C}$ NMR; DEPT; WL; LPR; EIS                                                                          | 87.1  | 23 | Mixed type of inhibitor                   | Physical          | Langmuir                                   | 179 |
| 27 | 4-(dimethylamino)-1-(6-methoxy-6-oxohexyl)pyridinium bromide                                 | Carbon steel      | $1 \times 10^{-3}$ M    | $^1\text{H}$ NMR; $^{13}\text{C}$ NMR; FTIR; LC–MS; WL; EIS; PDP; DFT; SEM                                                         | 93    | 30 | Mixed type of inhibitor                   | Chemical          | Langmuir                                   | 301 |
| 28 | 3-amino-7-(dimethylamino)phenothiazin-5-ium chloride                                         | Mild steel        | $5 \times 10^{-5}$ M    | EIS; LPR; PDP; SEM; DFT                                                                                                            | 96.90 | 25 | Mixed type of inhibitor                   | Chemical          | Langmuir                                   | 186 |
| 29 | 1-(2-(4-chlorophenyl)-2-oxoethyl)pyridazinium bromide                                        | Carbon steel      | $1 \times 10^{-3}$ M    | $^1\text{H}$ NMR; $^{13}\text{C}$ NMR; FTIR; LC–MS; WL; EIS; PDP; QM; OM                                                           | 91.67 | 25 | Mixed type of inhibitor                   | Chemical          | Langmuir                                   | 181 |
| 30 | 1-(3-phenoxypropyl)pyridazin-1-ium bromide                                                   | Mild steel        | $1 \times 10^{-3}$ M    | WL; EIS; SEM; XPS                                                                                                                  | 91.03 | 25 | -                                         | -                 | -                                          | 302 |

|    |                                                                              |                 |                      |                                                                        |        |    |                         |                   |          |     |
|----|------------------------------------------------------------------------------|-----------------|----------------------|------------------------------------------------------------------------|--------|----|-------------------------|-------------------|----------|-----|
| 31 | 1-(2-(4-nitrophenyl)-2-oxoethyl) pyridazinium bromide                        | Carbon steel    | $1 \times 10^{-3}$ M | WL; PDP; EIS; OM                                                       | 88     | 45 | Mixed type of inhibitor | Chemical          | Langmuir | 303 |
| 32 | Poly [3-butyl-1-vinylimidazolium bromide]                                    | Mild steel      | 40 ppm               | OCP; EIS; PDP; SEM; DFT                                                | 96     | -  | Mixed type of inhibitor | Physical          | Frumkin  | 304 |
| 33 | Polymeric ionic liquids: CSPTA-lauric                                        | Carbon steel    | 250 ppm              | FTIR; $^1\text{H}$ NMR; HE; PDP; EIS; WL; SEM; EDX; DFT                | 98.7   | -  | Mixed type of inhibitor | -                 | -        | 193 |
| 34 | Poly-2-acrylamido-2-methylpropane sulfonic acid triethanolamine derivative   | Carbon steel    | 250 ppm              | FTIR; $^1\text{H}$ NMR; $^{13}\text{C}$ NMR; HE; PDP; EIS; SEM         | 91.4   | -  | Mixed type of inhibitor | Physical-chemical | -        | 66  |
| 35 | 1-propyl-2,3-methylimidazolium bis(trifluoromethyl-sulfonyl) imide           | Mild steel      | 500 ppm              | WL; PDP; EIS; QM; QSAR; DFT                                            | 75.9   | 30 | Mixed type of inhibitor | Physical-chemical | Langmuir | 305 |
| 36 | 1-methyl-3-(2'-aminoethane)imidazolium bromide modified carbon dots (IM-CDs) | Q235 steel      | 200 mg·L $^{-1}$     | FTIR; UV; Ram; XPS; TEM; SPM; OCP; EIS; PDP; SVET; SEM; EDS; LS-CM; WL | 92.6   | -  | Cathodic type           | Physical-chemical | Langmuir | 79  |
| 37 | 1-hexyl-3-methylimidazolium trifluoromethanesulfonate                        | Mild steel      | 500 ppm              | PDP; EIS; FTIR; UV; QM                                                 | 81.16  | 30 | Mixed type of inhibitor | Physical-chemical | Temkin   | 173 |
| 38 | Methyltriocetyl ammonium methyl sulfate                                      | X52 steel       | 100 ppm              | $^1\text{H}$ NMR; $^{13}\text{C}$ NMR; OCP; EIS; PDP; XPS; SEM; AFM    | 94 ± 2 | 30 | Mixed type of inhibitor | Physical          | Langmuir | 306 |
| 39 | L-Phenyl Alanine methyl ester saccharinate                                   | Mild steel      | 100 ppm              | WL; PDP; EIS; OCP; FTIR; CA; SEM; EDS; DFT; MC                         | 93.2   | 60 | Mixed type of inhibitor | Physical          | Langmuir | 307 |
| 40 | 1,3-dibenzylimidazolium dodecanoate                                          | API 5LX52 steel | 100 ppm              | PDP; EIS; SEM                                                          | 88     | -  | Mixed type of inhibitor | Physical-chemical | Langmuir | 14  |

**Table S4.** Surfactants as corrosion inhibitors for carbon steel in 1.0 M HCl media, the techniques, methods and instruments used for evaluation of the inhibition performance, and the results obtained.

|   | Inhibitor name                                                                        | Sample       | Optimum concentration | Techniques/Investigations                                             | Max Efficiency (%) | T (°C) | Electrochemical Type    | Sorption          | Isotherm model | Ref |
|---|---------------------------------------------------------------------------------------|--------------|-----------------------|-----------------------------------------------------------------------|--------------------|--------|-------------------------|-------------------|----------------|-----|
| 1 | Bis(p-(N,N,N-dodecyltrimethylammonium bromide)benzylidene)benzene-1,4-diamine         | Carbon steel | $5 \times 10^{-3}$ M  | FTIR; $^1\text{H}$ NMR; EIS; PDP; WL; SEM                             | 94.51              | 30     | Mixed type of inhibitor | Physical-chemical | Langmuir       | 308 |
| 2 | N,N'-((oxalylbis(oxy))bis(ethane-2,1-diyl))bis(N,N-dimethyldodecan-1-aminium bromide) | Carbon steel | $5 \times 10^{-3}$ M  | FTIR; $^1\text{H}$ NMR; MS; WL; EIS; PDP; Surface tension measurement | 94.84              | 25     | Mixed type of inhibitor | Physical-chemical | Langmuir       | 89  |



|    |                                                                                                                                                                                                                                                                |                 |                        |                                                                                                                                     |              |    |                            |                       |            |     |
|----|----------------------------------------------------------------------------------------------------------------------------------------------------------------------------------------------------------------------------------------------------------------|-----------------|------------------------|-------------------------------------------------------------------------------------------------------------------------------------|--------------|----|----------------------------|-----------------------|------------|-----|
| 3  | (diethylhexanedioate)diyl-<br>$\alpha,\omega$ -bis(dimethyl myristyl<br>ammonium bromide)                                                                                                                                                                      | Carbon<br>steel | $5.0 \times 10^{-4}$ M | Conductivity<br>method; Surface<br>tension<br>measurements; $^1\text{H}$<br>NMR; WL                                                 | 96.39        | 35 | -                          | Chemical              | Langmuir   | 309 |
| 4  | N,N'-bis(2-hydroxyethyl)-<br>N,N'-dimethyl-N,N'-bis (2-<br>(tetradecanoyloxy) ethyl)<br>dodecane-1,12-diaminium<br>bromide                                                                                                                                     | Carbon<br>steel | $5 \times 10^{-3}$ M   | PDP; EIS;<br>Biodegradability<br>test                                                                                               | $\approx 99$ | 25 | Mixed type of<br>inhibitor | Physical–<br>chemical | Langmuir   | 310 |
| 5  | N1,N1,N1,N2,N2,N2-<br>hexadodecylhexane-1,6-<br>diaminium bromide                                                                                                                                                                                              | Carbon<br>steel | $5 \times 10^{-3}$ M   | FTIR; $^1\text{H}$ NMR;<br>Surface tension<br>measurement; PDP;<br>EIS; WL                                                          | 93           | 25 | Mixed type of<br>inhibitor | Physical–<br>chemical | Langmuir   | 311 |
| 6  | N1,N1,N3,N3-tetramethyl-<br>N1,N3-bis(2-<br>(tetradecanoyloxy)ethyl)propa-<br>ne-1,3-diammonium bromide                                                                                                                                                        | Carbon<br>steel | $1 \times 10^{-3}$ M   | $^1\text{H}$ NMR; FTIR;<br>Ram; Surface<br>tension<br>measurements;<br>Conductivity<br>method; Zeta<br>potential<br>measurement; WL | 99.1         | 25 | -                          | -                     | -          | 312 |
| 7  | Decamethylene bis-<br>pyridinium dibromide                                                                                                                                                                                                                     | P110 steel      | 300 mg/L               | PDP; EIS; WL;<br>SEM; CA; DFT                                                                                                       | 91.76        | 30 | Mixed type of<br>inhibitor | Physical–<br>chemical | Langmuir   | 313 |
| 8  | N,N'-((ethane-1,2-<br>diylbis(oxy))bis(2-oxoethane-<br>2,1-diyl))bis(N,N-dimethyl-4-<br>((E)-(2-((E)-octadec-9-<br>enoyl)hydrazineylidene)methy-<br>l)benzenaminium) dichloride                                                                                | X-65 steel      | $1 \times 10^{-4}$ M   | FTIR; $^1\text{H}$ NMR;<br>$^{13}\text{C}$ NMR; Surface<br>tension<br>measurement; EIS;<br>PDP; DFT; MC;<br>SEM; AFM; XRD           | 95           | 25 | Mixed type of<br>inhibitor | Physical              | Freundlich | 82  |
| 9  | Ethane-1,2-diyl bis(N,N-<br>dimethyl-N-<br>tetradecylammoniumacetoxyl)<br>dichloride                                                                                                                                                                           | Mild steel      | $1 \times 10^{-2}$ M   | FTIR; $^1\text{H}$ NMR;<br>Surface tension<br>measurement; WL;<br>PDP; EIS; UV;<br>SEM; EDX; TGA;<br>QM                             | 96.79        | 30 | Mixed type of<br>inhibitor | Chemical              | Langmuir   | 314 |
| 10 | SH1500 (2-mercaptoacetic<br>acid and polyethylene glycol-<br>1500 were esterified<br>individually in xylene)                                                                                                                                                   | Mild steel      | $1 \times 10^{-2}$ M   | FTIR; $^1\text{H}$ NMR;<br>WL; PDP; EIS                                                                                             | 79.29        | 25 | Mixed type of<br>inhibitor | Physical–<br>chemical | Langmuir   | 315 |
| 11 | Nonionic surfactant VI<br>(Sebacic acid–antipyrine<br>amide and polyethylene glycol<br>with 2000 g/mol were reacted<br>individually at equimolar<br>ratios in 100 mL xylene as a<br>solvent and p-toluene sulfonic<br>acid (0.01 g) as a dehydrating<br>agent) | Mild steel      | 800 ppm                | FTIR; $^1\text{H}$ NMR;<br>Surface tension<br>measurement; WL                                                                       | 98.5         | 25 | -                          | -                     | -          | 316 |
| 12 | L-cysteine + Triton X-100<br>surfactant                                                                                                                                                                                                                        | Mild steel      | 500 ppm + 1<br>ppm     | WL; PDP; EIS;<br>FTIR; SEM                                                                                                          | 98.58        | 30 | Mixed type of<br>inhibitor | Physical              | Langmuir   | 317 |
| 13 | P-benzylidene benzyl dodecyl<br>iminium chloride                                                                                                                                                                                                               | Carbon<br>steel | $5 \times 10^{-4}$ M   | $^1\text{H}$ NMR;<br>Conductivity                                                                                                   | 98.48        | 60 | Mixed type of<br>inhibitor | Chemical              | Langmuir   | 318 |



|    |                                                                                                                                                                                                                                                              |              |                                            |  |  |                                                                                                                                 |              |    |                         |                                              |          |     |  |  |  |  |  |  |  |
|----|--------------------------------------------------------------------------------------------------------------------------------------------------------------------------------------------------------------------------------------------------------------|--------------|--------------------------------------------|--|--|---------------------------------------------------------------------------------------------------------------------------------|--------------|----|-------------------------|----------------------------------------------|----------|-----|--|--|--|--|--|--|--|
|    |                                                                                                                                                                                                                                                              |              |                                            |  |  |                                                                                                                                 |              |    |                         | method; WL; UV;<br>PDP; EIS; QM;<br>SEM; EDX |          |     |  |  |  |  |  |  |  |
| 14 | Ethane-1,2-diylbis(N,N-dimethyl-N-alkylammoniumacetoxymethylenedichloride (16-E2-16))                                                                                                                                                                        | Mild steel   | 500 ppm                                    |  |  | WL; PDP; EIS;<br>FTIR; SEM; MD;<br>RDF                                                                                          | 91.61        | 30 | Mixed type of inhibitor | Chemical                                     | Langmuir | 211 |  |  |  |  |  |  |  |
| 15 | Chitosan-R16 surfactant (anionic polymeric surfactant based on ecofriendly chitosan materials)                                                                                                                                                               | Carbon steel | 800 ppm                                    |  |  | FITR; UV; Surface tension measurement; WL; PDP; EIS; AFM; XPS                                                                   | 92.62 ± 1.29 | 25 | Mixed type of inhibitor | Physical–chemical                            | Langmuir | 202 |  |  |  |  |  |  |  |
| 16 | Nonionic surfactants S2 (phenyl alanine were reacted with oleic acid and polyethylene glycol (600))                                                                                                                                                          | Carbon steel | 1 × 10 <sup>−3</sup> M                     |  |  | FITR; <sup>1</sup> H NMR; <sup>13</sup> C NMR; Surface tension measurement; PDP; EIS; QM                                        | 94.14        | 25 | Mixed type of inhibitor | Physical                                     | Langmuir | 319 |  |  |  |  |  |  |  |
| 17 | 1,2-ethane bis(dimethyl alkyl ammonium bromide) (12-2-12 GS)+n-butanol (1:1)                                                                                                                                                                                 | Mild steel   | 1 mM (12-2-12 GS)+1 mM (C <sub>4</sub> OH) |  |  | <sup>1</sup> H NMR; WeL; PDP; EIS; FITR; AFM; SEM; EDX; QM                                                                      | 98.76        | 30 | Mixed type of inhibitor | Chemical                                     | Langmuir | 320 |  |  |  |  |  |  |  |
| 18 | Novel hybrid cationic surfactants F6H6 (synthesized using perfluorobutylsulfonyl or perfluorohexylsulfonyl and hexyl as the hybrid chains, connected via a cationic bridge of N-benzyl-N',N'-dimethyl ethylenediamine)                                       | Carbon steel | 1.5 × 10 <sup>−4</sup> M                   |  |  | <sup>1</sup> H NMR; <sup>19</sup> F-NMR; FTIR; HRMS; Surface tension measurement; PDP; EIS; SEM; XPS                            | 95.80        | 25 | Mixed type of inhibitor | Physical–chemical                            | Langmuir | 321 |  |  |  |  |  |  |  |
| 19 | 1,12-bis((1H-benzimidazol-2-thioyl)dodecane                                                                                                                                                                                                                  | Mild steel   | 5 × 10 <sup>−4</sup> M                     |  |  | <sup>1</sup> H NMR; <sup>13</sup> C NMR; FITR; WL; EIS; PDP; LPR; SEM; DFT; MD; RDF                                             | 97           | 30 | Mixed type of inhibitor | Physical–chemical                            | Langmuir | 322 |  |  |  |  |  |  |  |
| 20 | N-(2-(3,4-dimethoxybenzylideneamino)ethyl)-N,N-dimethylhexadecan-1-ammonium bromide                                                                                                                                                                          | Mild steel   | 5 × 10 <sup>−3</sup> M                     |  |  | WL; PDP; EIS; SEM; EDX; DFT                                                                                                     | 93.71        | 70 | Mixed type of inhibitor | Chemical                                     | Langmuir | 323 |  |  |  |  |  |  |  |
| 21 | Synthesized surfactant VSBH (C <sub>31</sub> H <sub>47</sub> O <sub>4</sub> N <sub>2</sub> Br) (3-aminopyridine–vanillin Schiff base and hexadecyl bromoacetate esters were refluxed individually in acetone (100 mL) as a solvent for 4 h and left to cool) | Carbon steel | 400 ppm                                    |  |  | FITR; <sup>1</sup> H NMR; <sup>13</sup> C NMR; Surface tension measurements; Emulsification power; Biodegradation test; WL; PDP | 95           | 25 | Mixed type of inhibitor | Physical                                     | Langmuir | 324 |  |  |  |  |  |  |  |
| 22 | 4,4'-((1E,1'E)-((3,3'-dimethoxy-[1,1'-biphenyl]-4,4'-diyl)bis(azaneylylidene))bis(methaneylylidene))bis(N-dodecyl-N,N-                                                                                                                                       | Carbon steel | 1 × 10 <sup>−3</sup> M                     |  |  | FITR; <sup>1</sup> H NMR; PDP; EIS; EFM                                                                                         | 99.56        | 25 | Mixed type of inhibitor | Physical                                     | Langmuir | 61  |  |  |  |  |  |  |  |

|    |                                                                                                                                                                                                                                                                                                                                                                                                             |                  |                                       |                                                                                                                                                    |       |    |                            |                       |          |                     |
|----|-------------------------------------------------------------------------------------------------------------------------------------------------------------------------------------------------------------------------------------------------------------------------------------------------------------------------------------------------------------------------------------------------------------|------------------|---------------------------------------|----------------------------------------------------------------------------------------------------------------------------------------------------|-------|----|----------------------------|-----------------------|----------|---------------------|
|    | dimethylbenzenaminium)bro<br>mide                                                                                                                                                                                                                                                                                                                                                                           |                  |                                       |                                                                                                                                                    |       |    |                            |                       |          |                     |
| 23 | Bis(17-hydroxy-3,6,9,12,15-<br>pentaheptaheptadecyl) 4,4'<br>(3,3'-thiocarbonyl)bis(azan-1-<br>yl-1-ylidene) bis (methan-1-<br>yl-1-ylidene) bis (4-hydroxy-<br>3,1-phenylene)) bis (diazene-<br>2,1-diyl) dibenzenesulfonate                                                                                                                                                                               | Carbon<br>steel  | $7.5 \times 10^{-4}$ M                | FITR; $^1\text{H}$ NMR;<br>Surface tension<br>measurement; PDP;<br>EIS; EFM; UV;<br>SEM; QM; MD                                                    | 94.11 | 25 | Mixed type of<br>inhibitor | Physical              | Langmuir | <a href="#">199</a> |
| 24 | N-(3-(dimethyl benzyl<br>ammonio)propyl)palmitamide<br>chloride                                                                                                                                                                                                                                                                                                                                             | Carbon<br>steel  | $5 \times 10^{-4}$ M                  | FITR; $^1\text{H}$ NMR;<br>WL; PDP; EIS;<br>DFT                                                                                                    | 95.16 | 60 | Mixed type of<br>inhibitor | Chemical              | Langmuir | <a href="#">325</a> |
| 25 | (E)-N-(3-((4-hydroxy-3-<br>methoxybenzylidene)amino)p<br>ropyl)-N,N-<br>dimethylhexadecan-1-<br>aminium                                                                                                                                                                                                                                                                                                     | Carbon<br>steel  | $1 \times 10^{-2}$ M                  | FTIR; $^1\text{H}$ NMR;<br>MS; WL; PDP; EIS                                                                                                        | 96.18 | 70 | Mixed type of<br>inhibitor | Physical-<br>chemical | Langmuir | <a href="#">326</a> |
| 26 | Ethoxylated N-(2-(2-<br>aminoethylamino)ethyl)octade<br>c-9-enamide (ET-40)                                                                                                                                                                                                                                                                                                                                 | API X65<br>steel | $0.5 \text{ mM} \cdot \text{dm}^{-3}$ | FTIR; WL; PDP;<br>EIS; Surface<br>tension<br>measurement;<br>SEM; EDX                                                                              | 92.3  | 30 | Mixed type of<br>inhibitor | Physical              | Langmuir | <a href="#">327</a> |
| 27 | Alginates polymeric cationic<br>surfactants (ALGHB)                                                                                                                                                                                                                                                                                                                                                         | Carbon<br>steel  | 1000 ppm                              | FTIR; $^1\text{H}$ NMR;<br>WL; Surface<br>tension<br>measurement;<br>Foam power;<br>Emulsification<br>power; PDP; EIS;<br>Biodegradability<br>test | 89.31 | 70 | Mixed type of<br>inhibitor | Physical-<br>chemical | Langmuir | <a href="#">328</a> |
| 28 | Fluorinated surfactants BFIS<br>(hexafluoropropene trimer or<br>perfluorohexanesulfonyl<br>fluoride reacted with 4-<br>hydroxybenzyl alcohol,<br>followed with NBS to give the<br>intermediate 4-<br>(hexafluoropropene trimer-<br>oxy)benzyl bromide or 4-<br>(perfluorohexanesulfonyloxy)<br>benzyl bromide. The<br>intermediate was subjected to<br>react with imidazole and then<br>1,3-propanesultone) | Carbon<br>steel  | $1.5 \times 10^{-4}$ M                | $^1\text{H}$ NMR; $^{19}\text{F}$<br>NMR; LC-MS;<br>Surface tension<br>measurement; PDP;<br>EIS; SEM; XPS;<br>QM                                   | 95.7  | 25 | Mixed type of<br>inhibitor | Chemical              | Langmuir | <a href="#">329</a> |
| 29 | Dodecyl 41-hydroxy-<br>3,6,9,12,15,18,21,24,27,30,33,<br>36,39-<br>tridecaoxahentetracontyl<br>phthalate                                                                                                                                                                                                                                                                                                    | Carbon<br>steel  | $1.0 \times 10^{-2}$ M                | FTIR; MS; $^1\text{H}$<br>NMR; Surface<br>tension<br>measurement; PDP;<br>EIS; WL; SEM                                                             | 94.9  | 30 | Mixed type of<br>inhibitor | Physical-<br>chemical | Langmuir | <a href="#">198</a> |
| 30 | N,N'-<br>((oxalylbis(oxy))bis(ethane-<br>2,1-diyl))bis(N,N-                                                                                                                                                                                                                                                                                                                                                 | Carbon<br>steel  | $5 \times 10^{-3}$ M                  | FTIR; $^1\text{H}$ NMR;<br>MS; WL; PDP;<br>EIS; Surface                                                                                            | 94.84 | 25 | Mixed type of<br>inhibitor | Physical-<br>chemical | Langmuir | <a href="#">89</a>  |

| dimethyldodecan-1-aminium<br>bromide) |                                                                                                                               |                       | tension<br>measurement  |                                                                                                                                    |           |    |                            |                       |                              |
|---------------------------------------|-------------------------------------------------------------------------------------------------------------------------------|-----------------------|-------------------------|------------------------------------------------------------------------------------------------------------------------------------|-----------|----|----------------------------|-----------------------|------------------------------|
| 31                                    | Natural polymer xanthan gum<br>+ Sodium dodecyl sulfate<br>(SDS)                                                              | Mild steel            | 1000 ppm + 5<br>ppm SDS | WL; PDP; EIS;<br>SEM; QM; UV                                                                                                       | 90.38     | 30 | Mixed type of<br>inhibitor | Physical              | Langmuir <a href="#">330</a> |
| 32                                    | 1-dodecyl-5-methyl-1H-<br>benzo[d][1,2,3]triazol-1-ium<br>bromide                                                             | Carbon<br>steel       | $1 \times 10^{-3}$ M    | $^1\text{H}$ NMR; $^{13}\text{C}$<br>NMR; FTIR;<br>Surface tension<br>measurement;<br>Conductivity<br>method; WL; PDP;<br>EIS      | 97.3      | 25 | Mixed type of<br>inhibitor | Physical–<br>chemical | Langmuir <a href="#">200</a> |
| 33                                    | N,N-dimethyl-4-(((1-methyl-<br>2-phenyl-2,3-dihydro-1H-<br>pyrazol-4-yl)imino)methyl)-<br>N-hexadecylbenzenaminium<br>bromide | Carbon<br>steel       | $5 \times 10^{-3}$ M    | PDP; EIS; WL                                                                                                                       | 99.6      | 60 | Mixed type of<br>inhibitor | Chemical              | Langmuir <a href="#">331</a> |
| 34                                    | Imidazolium Gemini<br>surfactant [C14-4-C14im]Br2                                                                             | A3<br>Carbon<br>steel | $1.0 \times 10^{-5}$ M  | EIS; PDP; WL;<br>QM                                                                                                                | around 96 | 65 | Mixed type of<br>inhibitor | Chemical              | Langmuir <a href="#">209</a> |
| 35                                    | Hexadecyldimethylisopropyla<br>mmonium hydroxide<br>(HEDIAOH)                                                                 | Carbon<br>steel       | $1 \times 10^{-2}$ M    | FTIR; $^1\text{H}$ NMR;<br>Surface tension<br>measurement;<br>Conductivity<br>method; WL; EIS;<br>SEM;<br>Biodegradability<br>test | 96.8      | 30 | Mixed type of<br>inhibitor | Physical              | Langmuir <a href="#">201</a> |
| 36                                    | Alginate surfactant metal<br>complexes (AS–Cu)                                                                                | Carbon<br>steel       | $5 \times 10^{-3}$ M    | FTIR; $^1\text{H}$ NMR;<br>UV; EIS; PDP;<br>WL; EDX; SEM                                                                           | 96.27     | 25 | Mixed type of<br>inhibitor | Chemical              | Langmuir <a href="#">332</a> |
| 37                                    | N-(2-(2-<br>mercaptoacetoxy)ethyl)-N,N-<br>dimethyl dodecan-1-aminium<br>bromide                                              | Carbon<br>steel       | $1 \times 10^{-4}$ M    | FTIR; $^1\text{H}$ NMR;<br>MS; PDP; EIS;<br>WL; QM; SEM;<br>Surface tension<br>measurement;<br>Conductivity<br>method              | 95.86     | 30 | Mixed type of<br>inhibitor | Chemical              | Langmuir <a href="#">108</a> |
| 38                                    | l-phenylalanine methyl ester<br>hydrochloride + Sodium<br>dodecyl sulfate (SDS)                                               | Mild steel            | 400 ppm + 5<br>ppm      | WL; PDP; EIS;<br>QM; UV; SEM;<br>EDX                                                                                               | 88.8      | 60 | Mixed type of<br>inhibitor | Physical–<br>chemical | Langmuir <a href="#">333</a> |
| 39                                    | 4-(N,N,N-<br>dimethyldodecylammonium<br>bromide)benzylidene-4-<br>methoxybenzene-2-yl-amine                                   | Carbon<br>steel       | $5 \times 10^{-3}$ M    | FTIR; MS; PDP;<br>EIS; WL; SEM                                                                                                     | 97.7      | 80 | Mixed type of<br>inhibitor | Chemical              | Langmuir <a href="#">334</a> |
| 40                                    | Bis(p-(N,N,N-<br>tetradecyldimethylammonium<br>bromide)benzylidene thiourea<br>(14-S-14)                                      | Carbon<br>steel       | $5 \times 10^{-3}$ M    | FTIR; $^1\text{H}$ NMR;<br>WL; PDP; EIS;<br>Surface tension<br>measurement;<br>SEM; Conductivity<br>method                         | 97.75     | 25 | Mixed type of<br>inhibitor | Physical–<br>chemical | Langmuir <a href="#">212</a> |

**Table S5.** Plant extracts as corrosion inhibitors for carbon steel in 1.0 M HCl media, the techniques, methods and instruments used for evaluation of the inhibition performance, and the results obtained.

|    | Inhibitor name                                                             | Sample       | Optimum concentration  | Techniques/Investigations                                                                | Max Efficiency (%) | T (°C) | Electrochemical Type    | Sorption          | Isotherm model |
|----|----------------------------------------------------------------------------|--------------|------------------------|------------------------------------------------------------------------------------------|--------------------|--------|-------------------------|-------------------|----------------|
| 1  | Tunbergia fragrans                                                         | Mild steel   | 500 ppm                | WL; PDP; EIS; SEM; EDS                                                                   | 81.1               | 25     | Mixed type of inhibitor | Physical          | Langmuir       |
| 2  | Lavandula mairei extract                                                   | Mild steel   | 0.4 g·L <sup>-1</sup>  | WL; PDP; EIS; EDX; XPS; UV; DFT; MD                                                      | 92                 | 30     | Mixed type of inhibitor | Chemical          | Langmuir       |
| 3  | Magnolia grandiflora leaves extract                                        | Q235 steel   | 500 mg·L <sup>-1</sup> | FTIR; PDP; EIS; SEM; AFM; QM; MD                                                         | 88.2               | 25     | Mixed type of inhibitor | Physical–chemical | Langmuir       |
| 4  | Hyalomma tick extract                                                      | Carbon steel | 3 g·L <sup>-1</sup>    | FTIR; PDP; EIS; SEM; EDS; AFM                                                            | 95                 | 25     | Mixed type of inhibitor | Physical          | Langmuir       |
| 5  | Dardagan Fruit extract                                                     | Mild steel   | 3000 ppm               | PDP; EIS; SEM; EDX; AFM; FTIR; UV; CA                                                    | 97.5               | 25     | Mixed type of inhibitor | -                 | Langmuir       |
| 6  | Rosmarinus officinalis extract                                             | XC 48 steel  | 400 ppm                | WL; PDP; EIS; FTIR; LC–MS; MS; SEM; EDS; QM; MC                                          | 96.1               | 25     | Mixed type of inhibitor | Physical          | Langmuir       |
| 7  | Papaver somniferum leaves/stems extract                                    | Mild steel   | 600 ppm                | SEM; EDX; AFM; UV; FTIR; XRD; CA; EIS; PDP; DFT; MC; MD                                  | 97.65              | -      | Mixed type of inhibitor | Physical–chemical | -              |
| 8  | Aloysia citrodora leaves extract                                           | Mild steel   | 600 ppm                | FTIR; UV; EIS; PDP; SEM; AFM; CA; DFT; MC; MD                                            | 94                 | -      | Mixed type of inhibitor | Physical–chemical | Langmuir       |
| 9  | Ziziphora leaves extract                                                   | Mild steel   | 800 ppm                | UV; FTIR; SEM; AFM; CA; OCP; EIS; PDP; MC; MD                                            | 93                 | -      | Mixed type of inhibitor | Physical–chemical | Langmuir       |
| 10 | Extract of tangerine peels (ETP) mediated copper nanoparticles (ETP-CuNPs) | X80 steel    | 1.0 g·L <sup>-1</sup>  | UV; FTIR; XRD; SEM; EDX; TEM; Antimicrobial assay; Biocorrosion monitoring; WL; EIS; PDP | 95.3 ± 0.5         | 30     | Mixed type of inhibitor | Physical          | Langmuir       |
| 11 | Pterocarpus santalinoides leaves extract                                   | Carbon steel | 0.7 g·L <sup>-1</sup>  | OCP; EIS; LPR; PDP; SEM; EDX; AFM; UV                                                    | 94.02              | 60     | Mixed type of inhibitor | Chemical          | -              |
| 12 | Laurus nobilis leaves extract                                              | Carbon steel | 400 ppm                | UV; FTIR; SEM; AFM; EIS; PDP; CA; DFT; MC; MD                                            | 92                 | -      | Mixed type of inhibitor | Chemical          | Langmuir       |
| 13 | Rosa canina fruit extract                                                  | Mild steel   | 800 ppm                | UV; FTIR; EIS; PDP; SEM; EDS; CA; MD; QM                                                 | 85.7               | -      | Mixed type of inhibitor | -                 | -              |

|    |                                                                                                                    |              |                        |                                                         |       |    |                         |                   |            |
|----|--------------------------------------------------------------------------------------------------------------------|--------------|------------------------|---------------------------------------------------------|-------|----|-------------------------|-------------------|------------|
| 14 | Chinese gooseberry fruit shell extract                                                                             | Carbon steel | 1000 ppm               | OCP; EIS; PDP; SEM; AFM; CA; FTIR; UV; WL; DFT; MC; MD  | 94    | 25 | Mixed type of inhibitor | Physical–chemical | Langmuir   |
| 15 | Borage flower extract                                                                                              | Mild steel   | 800 ppm                | FTIR; UV; WL; EIS; PDP; SEM; AFM; CA; QM; DFT; MC; MD   | 91    | -  | Mixed type of inhibitor | Physical          | Langmuir   |
| 16 | Ficus tikoua leaves extract                                                                                        | Carbon steel | 1000 ppm               | FTIR; EIS; PDP; SEM; DFT                                | 95.80 | 25 | Mixed type of inhibitor | Chemical          | Langmuir   |
| 17 | Invasive brown seaweed Sargassum muticum extract                                                                   | Carbon steel | 1 g·L <sup>-1</sup>    | WL; OCP; PDP; EIS; SEM; XPS                             | 97    | 30 | Mixed type of inhibitor | Chemical          | Langmuir   |
| 18 | Peganum harmala seed extract                                                                                       | Mild steel   | 800 ppm                | FTIR; UV; OCP; PDP; EIS; SEM; AFM; CA; MC; DFT          | 95    | -  | Mixed type of inhibitor | Chemical          | Freundlich |
| 19 | Eriobotrya japonica Lindl (EJL) extract                                                                            | Mild steel   | 800 ppm                | FTIR; UV; EIS; PDP; SEM; AFM; MC; MD; QM                | 92.8  | -  | Mixed type of inhibitor | Physical–chemical | Langmuir   |
| 20 | Organic–inorganic hybrid complex based on Cissus quadrangularis (CQ) plant extract and zirconium acetate (CQ-ZrAc) | Mild steel   | 1100 ppm               | GC–MS; FTIR; XRD; SEM; EDX; UV; WL; OCP; PDP; EIS; DFT  | 89.87 | 30 | Mixed type of inhibitor | Physical          | Langmuir   |
| 21 | Pineapple stem extract                                                                                             | Mild steel   | 1000 ppm               | WL; PDP; EIS; SEM; EDX; UV                              | 97.6  | 65 | Mixed type of inhibitor | Physical–chemical | Langmuir   |
| 22 | Lemon Balm extract                                                                                                 | Mild steel   | 800 ppm                | FTIR; UV; Ram; OCP; EIS; PDP; AFM; SEM; QM; DFT; MC; MD | 94.6  | -  | Mixed type of inhibitor | -                 | -          |
| 23 | Mangifera indica (mango) leaves extract                                                                            | Mild steel   | 1000 ppm               | UV; FTIR; EIS; PDP; SEM; AFM; CA; MC; MD; RDF; QM; DFT  | 92    | -  | Mixed type of inhibitor | -                 | Langmuir   |
| 24 | Primula vulgaris extract                                                                                           | Mild steel   | 1000 ppm               | FTIR; UV; SEM; AFM; CA; OCP; PDP; EIS; MC; MD; DFT      | 95.50 | -  | Cathodic-type           | -                 | Langmuir   |
| 25 | Citrullus lanatus fruit (CLF) extract                                                                              | Mild steel   | 800 ppm                | UV; FTIR; OCP; EIS; PDP; SEM; AFM; CA; DFT; MC; MD      | 91    | -  | Mixed type of inhibitor | Physical–chemical | Langmuir   |
| 26 | Mustard seed extract                                                                                               | Mild steel   | 200 mg·L <sup>-1</sup> | FTIR; UV; OCP; PDP; EIS; SEM; AFM; WL; MC; MD; DFT      | 97    | 25 | Mixed type of inhibitor | Physical–chemical | Langmuir   |
| 27 | Sweet melon peel extract                                                                                           | Mild steel   | 0.5 g·L <sup>-1</sup>  | WL; PDP; OM                                             | 91.59 | 45 | Anodic-type             | Physical–chemical | Langmuir   |
| 28 | Sunflower seed hull extract                                                                                        | Carbon steel | 400 ppm                | FTIR; GC–MS; PDP; EIS; UV                               | 98.46 | -  | Mixed type of inhibitor | Physical          | Langmuir   |

|    |                                                    |                 |                        |                                                                              |       |    |                                                           |                       |                        |
|----|----------------------------------------------------|-----------------|------------------------|------------------------------------------------------------------------------|-------|----|-----------------------------------------------------------|-----------------------|------------------------|
| 29 | Ginkgo leaf extract                                | X70 steel       | 200 mg·L <sup>-1</sup> | FTIR; EIS; PDP;<br>OCP; PZC; SEM;<br>AFM; QM                                 | 92.5  | 45 | Mixed type of<br>inhibitor                                | Physical–<br>chemical | Langmuir               |
| 30 | Urtica dioica leaves extract                       | Mild steel      | 800 ppm                | OCP; EIS; PDP;<br>SEM; EDS; AFM;<br>MC; MD; QM                               | 92    | -  | Mixed type of<br>inhibitor                                | Physical–<br>chemical | Langmuir               |
| 31 | Rollinia occidentalis extract                      | Carbon<br>steel | 1 g·L <sup>-1</sup>    | WL; EIS; PDP;<br>UV; FTIR; SEM                                               | 85.7  | 25 | Mixed type of<br>inhibitor                                | Physical              | Langmuir               |
| 32 | Glycyrrhiza glabra leaves<br>extract               | Mild steel      | 800 ppm                | OCP; EIS; PDP;<br>AFM; CA; MD;<br>MC; QM                                     | 88    | -  | Mixed type of<br>inhibitor                                | Physical–<br>chemical | Langmuir               |
| 33 | Glycine max leaves extract                         | Mild steel      | 2 g·L <sup>-1</sup>    | PDP; EIS; SEM;<br>EDS; DFT                                                   | 94.07 | 25 | Mixed type of<br>inhibitor                                | Physical              | Langmuir               |
| 34 | Pisum sativum (green pea)<br>peels extract         | Mild steel      | 400 mg·L <sup>-1</sup> | DFT; FTIR; UV;<br>WL; PDP; EIS;<br>SEM; AFM; IC                              | 91    | -  | Mixed type of<br>inhibitor                                | Physical              | Langmuir               |
| 35 | Pistachio shell extract                            | Mild steel      | 800 ppm                | FTIR; UV; OCP;<br>EIS; PDP; SEM;<br>AFM; MC; MD;<br>DFT                      | 92.72 | -  | Mixed type of<br>inhibitor                                | Physical–<br>chemical | Langmuir               |
| 36 | Musa paradisica (Banana)<br>peels (raw) extract    | Mild steel      | 300 mg·L <sup>-1</sup> | WL; PDP; EIS;<br>OCP; AFM; HPLC;<br>UV; FTIR                                 | 90    | 26 | Anodic-type                                               | -                     | Langmuir               |
| 37 | Thymus vulgaris extract                            | Mild steel      | 1000 ppm               | FTIR; UV; Ram;<br>OCP; PDP; EIS;<br>SEM; CA; AFM;<br>WL; MC; MD;<br>DFT      | 95    | 25 | Mixed type of<br>inhibitor                                | Physical–<br>chemical | Langmuir               |
| 38 | Lilium brownii leaves extract                      | X70 steel       | 200 mg·L <sup>-1</sup> | FTIR; OCP; PDP;<br>EIS; SEM; AFM;<br>DFT; MD                                 | 85.70 | 25 | Mixed type of<br>inhibitor                                | Physical–<br>chemical | Langmuir               |
| 39 | Lagerstroemia speciosa leaf<br>extract             | Mild steel      | 500 ppm                | GC–MS; FTIR;<br>WL; EIS; PDP;<br>SEM; AFM; EDX;<br>DFT; MD                   | 94.41 | 60 | Mixed type<br>inhibition with<br>anodic<br>predominance   | Physical–<br>chemical | Langmuir               |
| 40 | Alkaloids extract (AE) from<br>Geissospermum laeve | C38 steel       | 100 mg·L <sup>-1</sup> | EIS; PDP; SEM;<br>CPC; HPLC; TLC;<br><sup>1</sup> H NMR; <sup>13</sup> C NMR | 92    | 25 | Mixed type<br>inhibition with<br>cathodic<br>predominance | Physical              | Langmuir               |
| 41 | Banana leaves water extract                        | X70 steel       | 600 mg·L <sup>-1</sup> | FTIR; OCP; PDP;<br>EIS; SEM; AFM;<br>DFT; MD                                 | 89.8  | 25 | Mixed type of<br>inhibitor                                | Physical–<br>chemical | Langmuir               |
| 42 | Phenolic extract of Ammi<br>visnaga                | Mild steel      | 0.15 g·L <sup>-1</sup> | HPLC; PDP; EIS                                                               | 93    | -  | Mixed type of<br>inhibitor                                | Chemical              | Temkin and<br>El-Awady |
| 43 | Stachys byzantina (SB) leaves<br>extract           | Mild steel      | 1200 ppm               | SEM; EDX; AFM;<br>CA; FTIR; UV;<br>XRD; Ram; EIS;<br>PDP; MC; MD;<br>DFT     | 97    | -  | Mixed type of<br>inhibitor                                | Physical–<br>chemical | Langmuir               |
| 44 | Aqueous extract of Artemisia<br>Herba Alba         | Mild steel      | 0.4 g·L <sup>-1</sup>  | WL; EIS; PDP;<br>SEM; EDX; XPS;<br>DFT; MD                                   | 92    | 30 | Mixed type of<br>inhibitor                                | -                     | Langmuir               |

|    |                                                                |              |                        |                                                        |       |    |                         |                   |          |
|----|----------------------------------------------------------------|--------------|------------------------|--------------------------------------------------------|-------|----|-------------------------|-------------------|----------|
| 45 | Methanolic extract of microalgae <i>Chlorococcum</i> sp. (MEC) | Mild steel   | 11.7 ppm               | GC–MS; DFT; WL; EIS; PDP; SEM; OM; AFM                 | 94.32 | 30 | Mixed type of inhibitor | -                 | Temkin   |
| 46 | <i>Opuntia elatior</i> fruit extract                           | Mild steel   | 500 ppm                | FTIR; <sup>1</sup> H NMR; WL; PDP; EIS; SEM; XRD       | ≈88   | 30 | Mixed type of inhibitor | Physical          | Temkin   |
| 47 | <i>Heracleum persicum</i> seeds phytoextract                   | Mild steel   | 400 ppm                | FTIR; UV; SEM; AFM; CA; WL; PDP; EIS; Ram; DFT; MC; MD | 96    | 25 | Mixed type of inhibitor | Physical–chemical | Langmuir |
| 48 | Castor oil-based corrosion inhibitor                           | Mild steel   | 140 µM                 | OCP; EIS; PDP; AFM; SEM; EDX; DFT                      | 92.8  | 25 | Mixed type of inhibitor | Chemical          | Langmuir |
| 49 | Anisole derivatives                                            | Mild steel   | 1 × 10 <sup>−3</sup> M | OCP; PDP; EIS; SEM; DFT; MD                            | 86.8  | -  | Mixed type of inhibitor | Chemical          | Langmuir |
| 50 | Natural nutmeg oil                                             | Carbon steel | 500 ppm                | WL; PDP; PDAP; DFT; MC                                 | 94.73 | -  | Mixed type of inhibitor | Physical–chemical | Langmuir |
| 51 | <i>Phellodendron chinense</i> Schneid                          | Carbon steel | 4 g·L <sup>−1</sup>    | FTIR; LC–MS; EIS; PDP; WL; SEM; DFT; MD                | 92.5  | -  | Mixed type of inhibitor | -                 | -        |

**Table S6.** Polymers as corrosion inhibitors for carbon steel in 1.0 M HCl media, the techniques, methods and instruments used for evaluation of the inhibition performance, and the results obtained.

|   | Inhibitor name                                                 | Sample       | Optimum concentration                                  | Techniques/Investigations                                                      | Max Efficiency (%)                                  | T (°C) | Electrochemical Type    | Sorption          | Isotherm model | Ref                 |
|---|----------------------------------------------------------------|--------------|--------------------------------------------------------|--------------------------------------------------------------------------------|-----------------------------------------------------|--------|-------------------------|-------------------|----------------|---------------------|
| 1 | 8-Hydroxyquinoline based chitosan derived carbohydrate polymer | Mild steel   | 1×10 <sup>−2</sup> g/L                                 | FTIR; <sup>1</sup> H NMR; <sup>13</sup> C NMR; EIS; PDP; SEM; EDS; UV; DFT; MC | 93.9                                                | -      | Mixed type of inhibitor | Chemical          | Langmuir       | <a href="#">374</a> |
| 2 | Poly(butylene succinate)                                       | Mild steel   | 600 ppm                                                | FTIR; XRD; SEM; EDX; AFM; WL; PDP; EIS                                         | 78                                                  | 25     | Mixed type of inhibitor | Physical          | Langmuir       | <a href="#">375</a> |
| 3 | Poly(o-toluidine) with zinc or lanthanum additives             | Carbon steel | 100 ppm + 5 mM (ZnCl <sub>2</sub> /LaCl <sub>3</sub> ) | FTIR; XRD; TEM; SEM; EDX; UV; OCP; PDP; EIS; DFT; MD                           | 96.8 (ZnCl <sub>2</sub> )/98.9 (LaCl <sub>3</sub> ) | 30     | Mixed type of inhibitor | Physical–chemical | Langmuir       | <a href="#">376</a> |
| 4 | P(o-phenylenediamine)                                          | Mild steel   | 15 ppm                                                 | WL; PDP                                                                        | 95                                                  | 25     | Mixed type of inhibitor | Physical          | Langmuir       | <a href="#">377</a> |
| 5 | Hyperbranched poly(cyanurateamine)                             | Mild steel   | 2 mg·L <sup>−1</sup>                                   | FTIR; <sup>1</sup> H NMR; <sup>13</sup> C NMR; WL; PDP; EIS; SEM; AFM          | 98                                                  | 25     | Mixed type of inhibitor | Physical          | Langmuir       | <a href="#">231</a> |
| 6 | Poly (naphthylamine-formaldehyde)                              | Mild steel   | 100 mg·L <sup>−1</sup>                                 | WL; PDP; EIS                                                                   | 99.90                                               | 30     | Mixed type of inhibitor | Physical          | Langmuir       | <a href="#">378</a> |
| 7 | Poly(aniline-formaldehyde)                                     | Mild steel   | 10 ppm                                                 | WL; PDP; EIS; AFM                                                              | 94.52                                               | -      | Mixed type of inhibitor | -                 | Langmuir       | <a href="#">230</a> |
| 8 | Poly(4-Vinylpyridine) and Potassium Iodide                     | Mild steel   | 100 mg·L <sup>−1</sup> + 0.1% KI                       | WL; PDP; EIS                                                                   | 97.39                                               | 25     | Mixed type of inhibitor | Physical–chemical | Langmuir       | <a href="#">233</a> |



|    |                                                                                                                                                                                       |                         |                         |                                                                           |       |    |                            |                       |                                    |                     |
|----|---------------------------------------------------------------------------------------------------------------------------------------------------------------------------------------|-------------------------|-------------------------|---------------------------------------------------------------------------|-------|----|----------------------------|-----------------------|------------------------------------|---------------------|
| 9  | Poly(ortho-ethoxyaniline)<br>(Mw = 13,000 g·mol <sup>-1</sup> )                                                                                                                       | Mild steel              | 100 ppm                 | GPC; UV; FTIR;<br>EIS; PDP; LPR                                           | 98    | -  | -                          | Chemical              | Temkin                             | <a href="#">379</a> |
| 10 | P(2-aminobenzothiazole)                                                                                                                                                               | Mild steel              | 12.7 × 10 <sup>-6</sup> | CV; WL; PDP;<br>EIS; SEM                                                  | 73.12 | 25 | Anodic<br>inhibitor        | Physical              | Temkin                             | <a href="#">380</a> |
| 11 | Poly(vinyl alcohol-cysteine)                                                                                                                                                          | Mild steel              | 0.6 wt%                 | UV; FTIR; SEM;<br>EDX; Conductivity<br>method; PDP; EIS;<br>WL            | 95.39 | -  | Mixed type of<br>inhibitor | Physical              | EL-Awady                           | <a href="#">234</a> |
| 12 | Poly (vinyl alcohol-o-<br>methoxy aniline)                                                                                                                                            | Mild steel              | 2000 ppm                | WL; PDP; EIS;<br>SEM                                                      | 97.21 |    | Mixed type of<br>inhibitor | Physical–<br>chemical | Langmuir                           | <a href="#">238</a> |
| 13 | Poly(vinyl alcohol–proline)                                                                                                                                                           | Mild steel              | 0.6 wt%                 | FTIR; XRD; SEM;<br>EDX; Conductivity<br>method; PDP; EIS                  | 94.82 | 30 | Mixed type of<br>inhibitor | Physical              | Langmuir                           | <a href="#">381</a> |
| 14 | Polyvinyl-Alcohol                                                                                                                                                                     | Carbon<br>steel         | 200 ppm                 | WL; PDP; EIS                                                              | 93    | 25 | Mixed type of<br>inhibitor | Physical–<br>chemical | Langmuir                           | <a href="#">382</a> |
| 15 | Polyvinyl alcohol–sulfanilic<br>acid water soluble composite                                                                                                                          | Mild steel              | 6000 ppm                | FTIR; WL; PDP;<br>EIS                                                     | 95.2  | -  | Mixed type of<br>inhibitor | Physical              | Langmuir                           | <a href="#">383</a> |
| 16 | Poly (vinyl alcohol – aniline)<br>water soluble composite                                                                                                                             | Mild steel              | 2000 ppm                | WL; PDP; EIS                                                              | 92    | -  | Mixed type of<br>inhibitor | -                     | Langmuir<br>and Temkin             | <a href="#">384</a> |
| 17 | Poly-levodopa                                                                                                                                                                         | Q235<br>Carbon<br>steel | 300 mg·L <sup>-1</sup>  | FTIR; UV; PDP;<br>EIS; SEM; CL-SM                                         | 97.81 | -  | Mixed type of<br>inhibitor | Physical              | Langmuir                           | <a href="#">385</a> |
| 18 | Modified polyaspartic acid                                                                                                                                                            | Carbon<br>steel         | 80 ppm                  | FTIR; <sup>1</sup> H NMR;<br>OCP; PDP; EIS;<br>WL; SEM; AFM;<br>DFT       | 90.39 | 30 | Mixed type of<br>inhibitor | Physical–<br>chemical | Langmuir                           | <a href="#">386</a> |
| 19 | Photo-cross-linked poly((E)-<br>(1-(5-(4-(3-(4-chlorophenyl)-<br>3-oxoprop-1-<br>enyl)phenoxy)pentyl)-1H-<br>1,2,3-triazol-4-yl)methyl<br>acrylate)                                   | Mild steel              | 15 ppm                  | FTIR; <sup>1</sup> H NMR;<br>UV; EIS; PDP;<br>SEM                         | 99.1  | -  | Mixed type of<br>inhibitor | Physical–<br>chemical | Langmuir                           | <a href="#">235</a> |
| 20 | Poly(4-vinylpyridine-<br>hexadecyl bromide)                                                                                                                                           | Mild steel              | 300 mg·L <sup>-1</sup>  | <sup>1</sup> H NMR; WL;<br>PDP; EIS                                       | 95    | -  | Cathodic<br>inhibitor      | Chemical              | Langmuir                           | <a href="#">387</a> |
| 21 | Poly (acrylamide-vinyl<br>acetate)                                                                                                                                                    | Carbon<br>steel         | 500 ppm                 | WL; PDP; EIS;<br>SEM; QM; MEP                                             | 97.17 | 30 | Mixed type of<br>inhibitor | Physical–<br>chemical | Langmuir                           | <a href="#">232</a> |
| 22 | Terpolymers (hydrochloride<br>salt of N,N-diallylmethionine<br>3. Cationic monomers 2 and 3<br>underwent alternate<br>copolymerization with SO <sub>2</sub> in<br>dimethyl sulfoxide) | Mild steel              | 70.2 µM                 | FTIR; <sup>1</sup> H NMR;<br>TGA; OCP; EIS;<br>PDP; XPS; SEM;<br>EDX      | 99.3  | 60 | Anodic<br>inhibitor        | Physical–<br>chemical | Langmuir,<br>Temkin,<br>Freundlich | <a href="#">388</a> |
| 23 | Sodium carboxymethyl<br>cellulose (Na-CMC)                                                                                                                                            | Mild steel              | 0.04 wt%                | WL; EIS; PDP;<br>SEM                                                      | 78    | 25 | Mixed type of<br>inhibitor | Physical–<br>chemical | Langmuir                           | <a href="#">239</a> |
| 24 | N, N, 1-tri(oxiran-2-<br>ylmethoxy)-5-((oxiran-2-<br>ylmethoxy)thio)-1H-1,2,4-<br>triazol-3-amine                                                                                     | C38<br>carbon<br>steel  | 1000 ppm                | DFT; MC; MD; <sup>1</sup> H<br>NMR; <sup>13</sup> C NMR;<br>PDP; EIS; SEM | 92.4  | -  | Mixed type of<br>inhibitor | Physical–<br>chemical | Langmuir                           | <a href="#">229</a> |

**Table S7.** Polymeric nanoparticles as corrosion inhibitors for carbon steel in 1.0 M HCl media, the techniques, methods and instruments used for evaluation of the inhibition performance, and the results obtained.

|    | Inhibitor name                                                                                                               | Sample       | Optimum concentration  | Techniques/<br>Investigations                                                           | Max Efficiency (%) | T (°C) | Electrochemical Type    | Sorption          | Isotherm model | Ref                 |
|----|------------------------------------------------------------------------------------------------------------------------------|--------------|------------------------|-----------------------------------------------------------------------------------------|--------------------|--------|-------------------------|-------------------|----------------|---------------------|
| 1  | Poly 12-(3-amino phenoxy) dodecane-1-thiol surfactant self assembled on silver nanoparticles                                 | Carbon steel | 375 ppm                | FTIR; <sup>1</sup> H NMR; UV; XRD; TGA; Surface tension measurements; TEM; WL; PDP; EDX | 87.59              | 25     | Mixed type of inhibitor | -                 | -              | <a href="#">246</a> |
| 2  | Elaeis guineensis (EG) and silver nanoparticles (AgNPs)                                                                      | Mild steel   | 10% v/v                | WL; EIS; PDP; XRD; SEM; AFM; TEM; EDX                                                   | 94.1               | -      | Mixed type of inhibitor | Physical          | Langmuir       | <a href="#">389</a> |
| 3  | Onion mesocarp-nickel nanocomposites                                                                                         | X80 steel    | 20% v/v                | UV; TEM; DLS; XRD; SEM; EDS; FTIR; WL; EIS; OCP; PDP; EFM; LPR; AFM                     | 97.8               | 50     | Mixed type of inhibitor | Physical          | -              | <a href="#">390</a> |
| 4  | Organic nanoparticles of acetohydrazides (N'((E)-benzylidene)-2-(4-((E)hydrazonomethyl)phenoxy)acetohydrazide nanoparticles) | Mild steel   | 1 × 10 <sup>-3</sup> M | <sup>1</sup> H NMR; <sup>13</sup> C NMR; FTIR; TEM; XRD; DLS; PDP; EIS; SEM; AFM        | 96.7               | 25     | Mixed type of inhibitor | Physical          | Langmuir       | <a href="#">391</a> |
| 5  | Polyvinylpyrrolidone stabilized crystalline super-paramagnetic nanoparticles                                                 | Mild steel   | 0.10 wt%               | TEM; XRD; PDP; EIS; DLS; Zeta potential analysis                                        | 98.39              | 30     | Mixed type of inhibitor | -                 | -              | <a href="#">392</a> |
| 6  | Fe <sub>3</sub> O <sub>4</sub> @SiO <sub>2</sub> modified with hyperbranched polyglycerol                                    | Mild steel   | 300 ppm                | FTIR; XRD; TEM; TGA; AFM; OCP; LPR; EIS; WL; DFT; MC; MD                                | 89.92              | 25     | Mixed type of inhibitor | Physical-chemical | Langmuir       | <a href="#">393</a> |
| 7  | Ternary glycine-functionalized graphene/Fe <sub>3</sub> O <sub>4</sub> nanocomposite                                         | Mild steel   | 50 ppm                 | XRD; FTIR; EDX; SEM; TEM; WL; PDP; EIS                                                  | 98.18              | 60     | Cathodic type           | Chemical          | Langmuir       | <a href="#">394</a> |
| 8  | Polydopamine (PDA) nanoparticles                                                                                             | Mild steel   | 5 mg·L <sup>-1</sup>   | FTIR; UV; Zeta potential analysis; SEM; EDS; AFM; CA; XRD; OCP; PDP; EIS                | 99                 | -      | Mixed type of inhibitor | -                 | -              | <a href="#">242</a> |
| 9  | Electrospun TiO <sub>2</sub> -nanofibers/Schiff base phenylalanine composite                                                 | Mild steel   | 300 mg·L <sup>-1</sup> | FTIR; SEM; EDX; TEM; XPS; TGA; XRD; OCP; PDP; LPR EIS;                                  | 97.9               | 30     | Mixed type of inhibitor | Physical-chemical | Langmuir       | <a href="#">247</a> |
| 10 | Nonionic amphiphilic chitosan nanoparticles                                                                                  | Carbon steel | 250 ppm                | <sup>1</sup> H NMR; FTIR; DLS; PDP; EIS; CA; SEM                                        | 97.3               | -      | Mixed type of inhibitor | -                 | -              | <a href="#">241</a> |
| 11 | Core-shell preparing poly(2-acrylamido-2-methylpropane sulfonic acid) (PAMPS)-Na magnetite nanogel                           | Carbon steel | 250 ppm                | FTIR; TEM; PDP; EIS; SEM                                                                | 97.21              | 45     | Mixed type of inhibitor | Chemical          | Langmuir       | <a href="#">395</a> |

|    |                                                                                                                                                                                           |              |                                      |                                                                                       |              |    |                                                       |                   |          |     |
|----|-------------------------------------------------------------------------------------------------------------------------------------------------------------------------------------------|--------------|--------------------------------------|---------------------------------------------------------------------------------------|--------------|----|-------------------------------------------------------|-------------------|----------|-----|
| 12 | Chitosan grafted with poly(ethylene glycol) silver nanoparticles                                                                                                                          | Carbon steel | $1 \times 10^{-3}$ M                 | FTIR; $^1\text{H}$ NMR; XRD; TEM; EDX; PDP; EIS                                       | 92.75        | 25 | Mixed type of inhibitor                               | -                 | -        | 396 |
| 13 | Graphene oxide-chitosan-ZnO hybrids                                                                                                                                                       | Mild steel   | 500 ppm                              | FTIR; UV; SEM; AFM; TEM; PDP; EIS; WL                                                 | 85.61        | 25 | Mixed type of inhibitor                               | Physical-chemical | Langmuir | 397 |
| 14 | Chitosan-cobalt nanocomposites                                                                                                                                                            | Mild steel   | $300 \text{ mg} \cdot \text{L}^{-1}$ | UV; FTIR; TEM; EDAX; SEM; PDP; EIS; AFM                                               | 97           | -  | Mixed type of inhibitor                               | Physical-chemical | Frumkin  | 398 |
| 15 | Cysteine based silver-gold nanocomposite (Cys/Ag-Au NCz)                                                                                                                                  | Mild steel   | 300 ppm                              | OCP; FTIR; XRD; UV; SEM; EDX; TEM; TGA; WL; PDP; EIS                                  | 96.01        | 30 | Mixed type of inhibitor                               | Physical          | Langmuir | 399 |
| 16 | Tangerine peels extract mediated silver nanoparticles                                                                                                                                     | X80 steel    | $1.0 \text{ g} \cdot \text{L}^{-1}$  | UV, XRD, TEM, EDX, DLS, FTIR, WL, OCP, EIS, PDP, SEM                                  | 93.9         | 30 | Mixed type of inhibitor                               | Physical          | Langmuir | 400 |
| 17 | Cobalt ferrite nanoparticles dispersed in silica matrix                                                                                                                                   | Mild steel   | $1.2 \text{ g} \cdot \text{L}^{-1}$  | FTIR; $^1\text{H}$ NMR; UV; XRD; TGA; Surface tension measurements; TEM; WL; PDP; EDX | $\approx 94$ | 60 | -                                                     | Physical-chemical | Langmuir | 401 |
| 18 | Magnetite ( $\text{Fe}_3\text{O}_4$ ) polymer composite ( $\text{Fe}_3\text{O}_4/\text{AM-co-AA-Na}$ composite)                                                                           | Carbon steel | 100 ppm                              | FTIR; UV; TEM; PDP; EIS                                                               | 99.75        | -  | -                                                     | -                 | -        | 402 |
| 19 | Spherical polydopamine (PDA) nanoparticles                                                                                                                                                | Mild steel   | 40 mg/L                              | FTIR; SEM; DLS; WL; PDP; EIS; AFM                                                     | 86.42        | -  | Mixed type of inhibitor                               | Physical-chemical | Langmuir | 403 |
| 20 | Silver AMPS/NIPAm hybrid polymer (2-acrylamido-2-methylpropane sulfonic acid (AMPS)/N-isopropylacrylamide (NIPAm)-Ag nanogel) (AMPS/NIPAm-Ag NPs)                                         | Carbon steel | 250 ppm                              | UV; TEM; XRD; DLS; FTIR; EIS; PDP                                                     | 81.46        | -  | Mixed type of inhibitor                               | -                 | -        | 404 |
| 21 | Magnetite ( $\text{Fe}_3\text{O}_4$ ) nanoparticles coated with rosin amidoxime                                                                                                           | Mild steel   | 150 ppm                              | FTIR; TEM; DLS; PDP; EIS                                                              | 96.8         | -  | Mixed type of inhibitor                               | -                 | -        | 405 |
| 22 | Zinc oxide nanoparticles                                                                                                                                                                  | Carbon steel | 0.02 g/L                             | XRD; SEM; PDP; EIS                                                                    | 92.25        | 30 | Mixed type (predominantly cathodic type) of inhibitor | Physical-chemical | Langmuir | 406 |
| 23 | Self-stabilized magnetic polymeric composite nanoparticles of coated poly-(sodium 2-acrylamido-2-methylpropane sulfonate-co-styrene)/magnetite (PAMPS-Na-co-St/ $\text{Fe}_3\text{O}_4$ ) | Carbon steel | 250 ppm                              | FTIR; TEM; TGA; Surface tension; PDP; EIS                                             | 99.7         | -  | Mixed type of inhibitor                               | -                 | -        | 407 |
| 24 | N-isopropyl acrylamide co-polymer nanogel                                                                                                                                                 | Carbon steel | 250 ppm                              | FTIR; TEM; DLS; PDP; EIS                                                              | 94.8         | -  | Mixed type of inhibitor                               | -                 | -        | 408 |
| 25 | Aspartic di-dodecyl ester hydrochloride acid (ADH) and                                                                                                                                    | Carbon steel | 1000 ppm                             | FTIR; PDP; QM; SEM; EDX;                                                              | 91.5         | 30 | Mixed type of inhibitor                               | Physical-chemical | Langmuir | 409 |

---

its ZnO-NPs derivative  
(ADH-ZnO)

---
